# Supplementary material
Source: MDPI journal article supplement (https://www.mdpi.com/2673-6209/1/3/16)
Supplement: s1 [file s1]

## Supplementary Materials

# Inter- and Intra-Hydrogen Bonding Strategy to Control the Fluorescence of Acylhydrazone-based Conjugated Microporous Polymers and Their Application to Nitroaromatics Detection

*Inhwan Cha<sup>1,†</sup>, Seohyun Baek<sup>1,†</sup>, Sun Gu Song<sup>1</sup>, Junggong Kim<sup>2</sup>, Ho Keun Lee<sup>2</sup>, Jongman Lee<sup>2</sup>, Kyung-su Kim<sup>3,\*</sup> and Changsik Song<sup>1,\*</sup>*

<sup>1</sup>*Department of Chemistry, Sungkyunkwan University, 2066 Seobu-ro, Jangan-gu, Suwon-si, Gyeonggi-do 16419 Republic of Korea.*

<sup>2</sup>*PNL Global Co., Ltd., B1, 10 Sapyeongdae-ro 2-gil, Seocho-gu, Seoul 06652 Republic of Korea*

<sup>3</sup>*Convergence Research Center for Energy and Environmental Sciences, Sungkyunkwan University, 2066 Seobu-ro, Jangan-gu, Suwon-si, Gyeonggi-do 16419 Republic of Korea.*

Email: [kimkyungsu@skku.edu](mailto:kimkyungsu@skku.edu) and [songcs@skku.edu](mailto:songcs@skku.edu)

†These authors contributed equally to this work.

## Table of Contents

|                                                                                                                               |     |
|-------------------------------------------------------------------------------------------------------------------------------|-----|
| ✓ <b>Figure S1.</b> FT-IR spectra of <b>BH-CMP</b> and <b>ABH-CMP</b> .....                                                   | S-2 |
| ✓ <b>Figure S2.</b> Solid-state <sup>13</sup> C CP/MAS NMR of <b>BH-CMP</b> and <b>ABH-CMP</b> .....                          | S-2 |
| ✓ <b>Figure S3.</b> Powder X-ray diffraction patterns of <b>BH-CMP</b> and <b>ABH-CMP</b> .....                               | S-3 |
| ✓ <b>Figure S4-6.</b> Photoluminescence emission spectra of <b>CMPs</b> suspension with different concentrations of NACs..... | S-4 |
| ✓ <b>Table S1.</b> Limit of Detection of <b>CMPs</b> for NACs .....                                                           | S-7 |



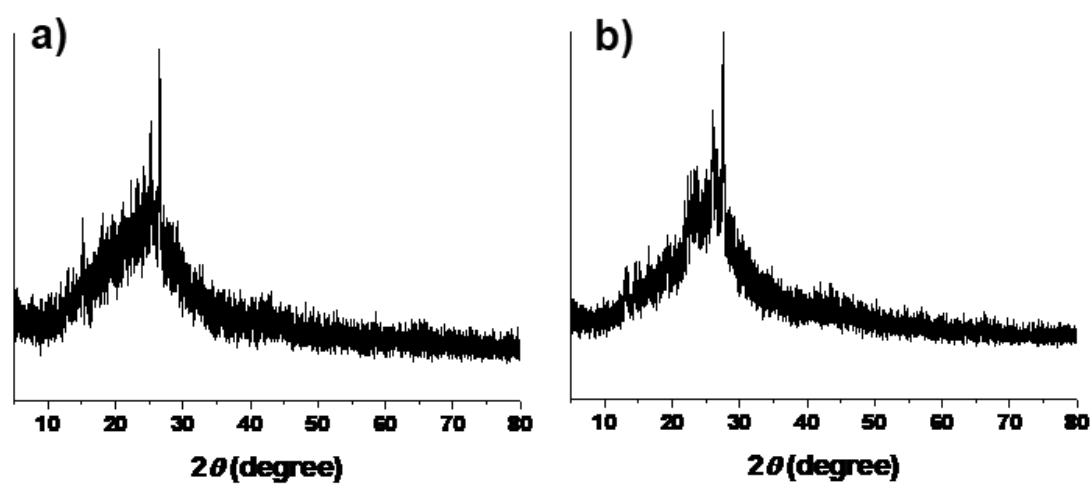

**Figure S3:** Powder X-ray diffraction patterns of (a) **BH-CMP** and (b) **ABH-CMP**.

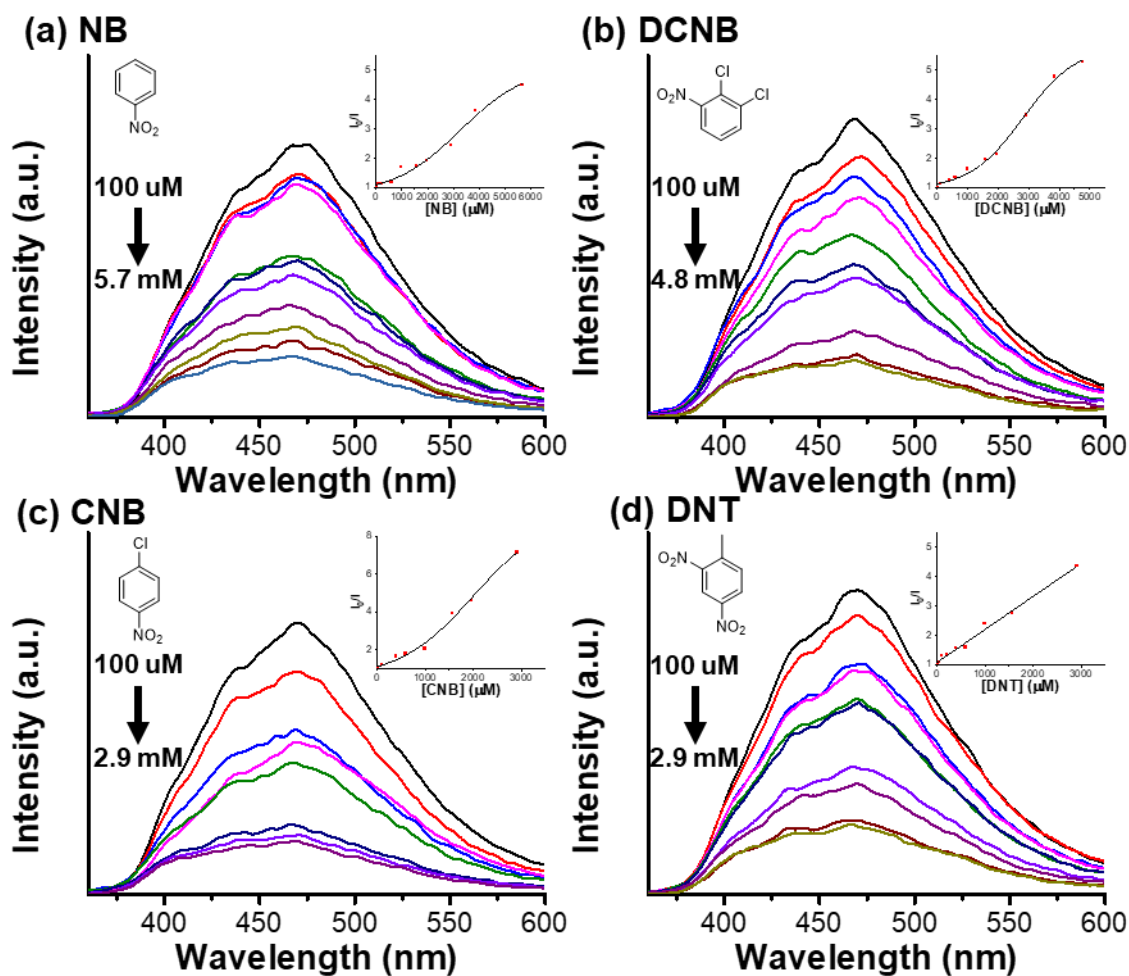

**Figure S4:** The photoluminescence emission spectra of **BH-CMP** suspension in the DMF/H<sub>2</sub>O (40/60; v/v) with different concentrations of NACs. (a) nitrobenzene, (b) 2,3-dichloronitrobenzene, (c) 1-chloro-4-nitrobenzene, and (d) 2,4-dinitrotoluene. Plots of relative PL intensity ( $I_0/I$ ) versus concentration of NACs with **BH-CMP** suspension in the DMF/H<sub>2</sub>O (40/60; v/v) are provided in inset ( $I$  = PL intensity,  $I_0$  = PL intensity at NACs concentration of 0 M)

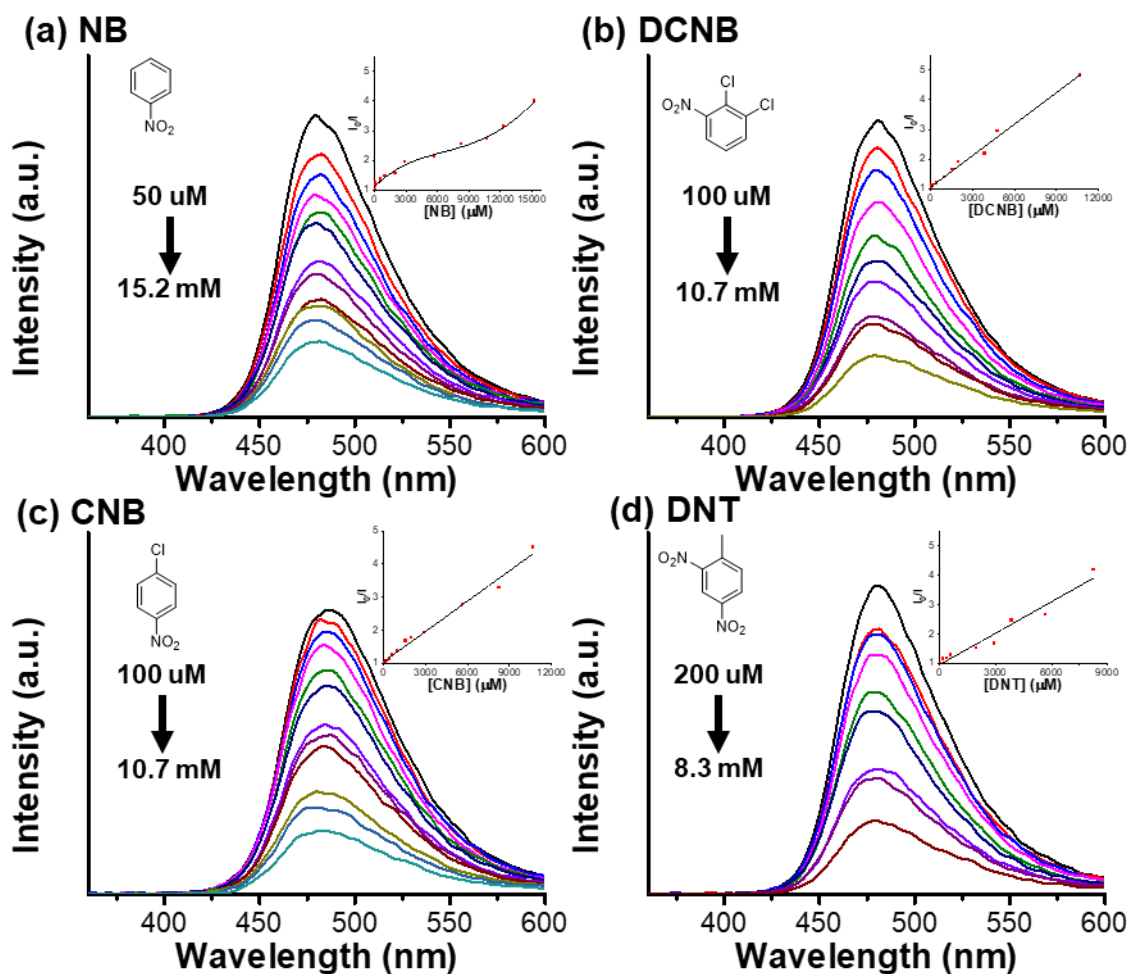

**Figure S5:** The photoluminescence emission spectra of **ABH-CMP** suspension in the DMF/H<sub>2</sub>O (40/60; v/v) with different concentrations of NACs. (a) nitrobenzene, (b) 2,3-dichloronitrobenzene, (c) 1-chloro-4-nitrobenzene, and (d) 2,4-dinitrotoluene. Plots of relative PL intensity ( $I_0/I$ ) versus concentration of NACs with **ABH-CMP** suspension in the DMF/H<sub>2</sub>O (40/60; v/v) are provided in inset ( $I$  = PL intensity,  $I_0$  = PL intensity at NACs concentration of 0 M)

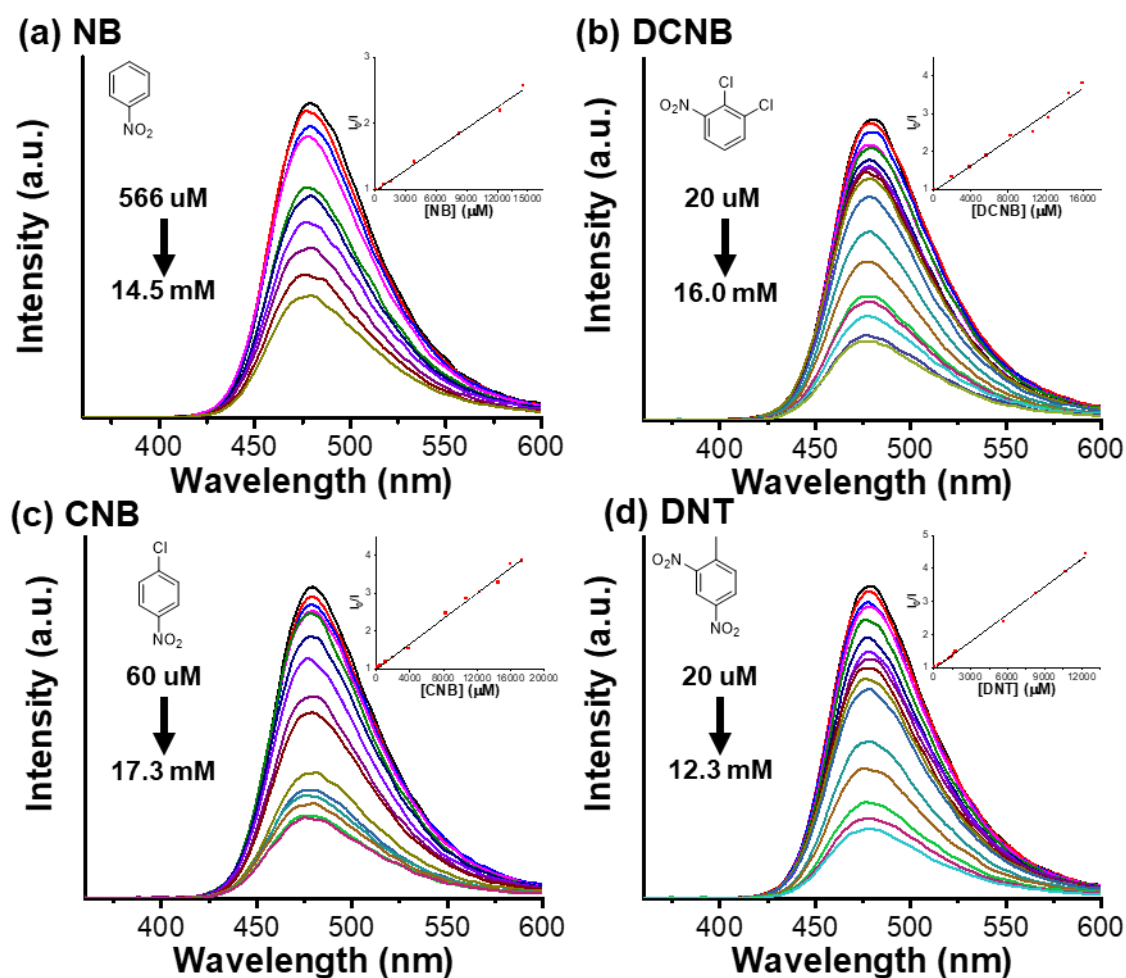

**Figure S6:** The photoluminescence emission spectra of **ABH-CMP** suspension in the DMF with different concentrations of NACs. (a) nitrobenzene, (b) 2,3-dichloronitrobenzene, (c) 1-chloro-4-nitrobenzene, and (d) 2,4-dinitrotoluene. Plots of relative PL intensity ( $I_0/I$ ) versus concentration of NACs with **ABH-CMP** suspension in the DMF are provided in inset ( $I$  = PL intensity,  $I_0$  = PL intensity at NACs concentration of 0 M)

**Table S1.** Limit of Detection (LOD) of CMPs for NACs.

|             | <b>B-CMP 60</b> | <b>A-CMP 0</b> | <b>A-CMP 60</b> |
|-------------|-----------------|----------------|-----------------|
| <b>TNT</b>  | 3.48 $\mu$ M    | 8.78 $\mu$ M   | 29.1 $\mu$ M    |
| <b>NB</b>   | 103 $\mu$ M     | 243 $\mu$ M    | 15.3 $\mu$ M    |
| <b>DCNB</b> | 213 $\mu$ M     | 408 $\mu$ M    | 151 $\mu$ M     |
| <b>CNB</b>  | 47.8 $\mu$ M    | 9.94 $\mu$ M   | 23.6 $\mu$ M    |
| <b>DNT</b>  | 30.5 $\mu$ M    | 2.24 $\mu$ M   | 202 $\mu$ M     |
